# Supplementary material for: Strand-Specific RNA Sequencing Reveals Gene Expression Patterns in F1 Chick Breast Muscle and Liver after Hatching
Source: MDPI journal article supplement (doi:10.3390/ani14091335), 2024-04-29
Supplement: s1 [file s1]

Table S1. The quality control data of the newly sequenced transcriptome data of parental lines.

| Sample                        | Raw Reads | Bases(GB) | GC(%)  | Q20(%) | Q30(%) | Avg.Quality |
|-------------------------------|-----------|-----------|--------|--------|--------|-------------|
| Maternal line-liver-female-1  | 38256548  | 5.738     | 49.435 | 94.755 | 88.86  | 34.93       |
| Maternal line-liver-female-2  | 37231242  | 5.585     | 48.925 | 94.9   | 89.145 | 34.985      |
| Maternal line-liver-female-3  | 38164492  | 5.725     | 49.69  | 95.685 | 90.08  | 35.205      |
| Maternal line-liver-male-1    | 39384692  | 5.908     | 48.4   | 94.825 | 89.125 | 34.97       |
| Maternal line-liver-male-2    | 37623608  | 5.644     | 48.99  | 95.44  | 89.87  | 35.145      |
| Maternal line-liver-male-3    | 39594696  | 5.939     | 48.52  | 95.81  | 90.375 | 35.26       |
| Maternal line-muscle-female-1 | 39072190  | 5.861     | 51.83  | 95.03  | 89.455 | 35.04       |
| Maternal line-muscle-female-2 | 37673436  | 5.651     | 51.665 | 94.655 | 88.67  | 34.895      |
| Maternal line-muscle-female-3 | 41229444  | 6.184     | 51.28  | 95.69  | 90.36  | 35.24       |
| Maternal line-muscle-male-1   | 42568778  | 6.385     | 51.44  | 95.435 | 90.035 | 35.165      |
| Maternal line-muscle-male-2   | 36514700  | 5.477     | 51.585 | 94.4   | 88.67  | 34.855      |
| Maternal line-muscle-male-3   | 37119460  | 5.568     | 52.24  | 95.27  | 89.75  | 35.105      |
| Paternal line-liver-female-1  | 40724868  | 6.109     | 48.695 | 95.4   | 89.965 | 35.155      |
| Paternal line-liver-female-2  | 89272664  | 13.391    | 48.06  | 95.965 | 90.425 | 35.285      |
| Paternal line-liver-female-3  | 40022266  | 6.003     | 49.225 | 95.925 | 90.585 | 35.3        |
| Paternal line-liver-male-1    | 56154980  | 8.423     | 48.515 | 96.54  | 91.62  | 35.51       |
| Paternal line-liver-male-2    | 39479244  | 5.922     | 53.66  | 93.555 | 87.695 | 34.625      |
| Paternal line-liver-male-3    | 37987870  | 5.698     | 49.855 | 95.205 | 89.385 | 35.055      |
| Paternal line-muscle-female-1 | 39319988  | 5.898     | 52.605 | 94.685 | 88.59  | 34.885      |
| Paternal line-muscle-female-2 | 37766468  | 5.665     | 50.84  | 94.97  | 89.005 | 34.98       |
| Paternal line-muscle-female-3 | 36359676  | 5.454     | 51.45  | 94.79  | 89.045 | 34.955      |
| Paternal line-muscle-male-1   | 37438142  | 5.616     | 51.93  | 95.445 | 89.81  | 35.135      |
| Paternal line-muscle-male-2   | 42584706  | 6.388     | 50.435 | 95.83  | 90.68  | 35.295      |
| Paternal line-muscle-male-3   | 38257538  | 5.739     | 49.98  | 96.01  | 90.76  | 35.335      |

Table S2. Significantly enriched GO terms of different gene sets in the breast muscle.

| Gene set                         | Cat-<br>e-<br>gory | Term                                                                            | Gene count | p-value     | Fold En-<br>richment |
|----------------------------------|--------------------|---------------------------------------------------------------------------------|------------|-------------|----------------------|
| Maternal line<br>vs. F1<br>cross | BP                 | GO:0030866~cortical actin cytoskeleton organization                             | 7          | 4.95E-04    | 6.372293447          |
|                                  | BP                 | GO:0006805~xenobiotic metabolic process                                         | 9          | 0.004597979 | 3.351660839          |
|                                  | BP                 | GO:0042073~intracellular transport                                              | 6          | 0.004713452 | 5.174493927          |
|                                  | BP                 | GO:0006397~mRNA processing                                                      | 11         | 0.00565768  | 2.772998028          |
|                                  | BP                 | GO:0006869~lipid transport                                                      | 7          | 0.017905476 | 3.277179487          |
|                                  | BP                 | GO:0032784~regulation of DNA-templated transcription, elongation                | 3          | 0.020498708 | 12.28942308          |
|                                  | BP                 | GO:0006412~translation                                                          | 14         | 0.021257127 | 2.012303194          |
|                                  | BP                 | GO:0070328~triglyceride homeostasis                                             | 4          | 0.025746286 | 5.958508159          |
|                                  | BP                 | GO:0008053~mitochondrial fusion                                                 | 4          | 0.025746286 | 5.958508159          |
|                                  | BP                 | GO:0000122~negative regulation of transcription from RNA polymerase II promoter | 27         | 0.02792995  | 1.541530421          |
|                                  | BP                 | GO:0042060~wound healing                                                        | 6          | 0.029131647 | 3.390185676          |
|                                  | BP                 | GO:0045778~positive regulation of ossification                                  | 3          | 0.032794175 | 9.831538462          |
|                                  | BP                 | GO:0006939~smooth muscle contraction                                            | 4          | 0.032805327 | 5.461965812          |

|          |    |                                                                                                                            |    |             |             |
|----------|----|----------------------------------------------------------------------------------------------------------------------------|----|-------------|-------------|
|          | BP | GO:0042632~cholesterol homeostasis                                                                                         | 7  | 0.040485459 | 2.730982906 |
|          | BP | GO:0030490~maturation of SSU-rRNA                                                                                          | 4  | 0.040761384 | 5.041814596 |
|          | BP | GO:0000413~protein peptidyl-prolyl isomerization                                                                           | 5  | 0.041641434 | 3.724067599 |
|          | BP | GO:0032981~mitochondrial respiratory chain complex I assembly                                                              | 6  | 0.042569936 | 3.072355769 |
|          | BP | GO:0006357~regulation of transcription from RNA polymerase II promoter                                                     | 72 | 0.046735774 | 1.231507949 |
|          | BP | GO:0008585~female gonad development                                                                                        | 4  | 0.049592535 | 4.681684982 |
|          | BP | GO:0042744~hydrogen peroxide catabolic process                                                                             | 4  | 0.049592535 | 4.681684982 |
|          | BP | GO:0042554~superoxide anion generation                                                                                     | 4  | 0.049592535 | 4.681684982 |
|          | CC | GO:0005840~ribosome                                                                                                        | 16 | 0.001697472 | 2.50235728  |
|          | CC | GO:0043231~intracellular membrane-bounded organelle                                                                        | 17 | 0.006627658 | 2.108012583 |
|          | CC | GO:0030992~intraciliary transport particle B                                                                               | 5  | 0.008908804 | 5.786701209 |
|          | CC | GO:0005747~mitochondrial respiratory chain complex I                                                                       | 7  | 0.025617494 | 3.038018135 |
|          | CC | GO:0005930~axoneme                                                                                                         | 7  | 0.031802196 | 2.893350604 |
|          | CC | GO:0005929~cilium                                                                                                          | 10 | 0.039739739 | 2.170012953 |
|          | CC | GO:1902494~catalytic complex                                                                                               | 3  | 0.042469282 | 8.680051813 |
|          | CC | GO:0022625~cytosolic large ribosomal subunit                                                                               | 7  | 0.042772815 | 2.700460564 |
|          | MF | GO:0001228~transcriptional activator activity, RNA polymerase II transcription regulatory region sequence-specific binding | 20 | 0.013269432 | 1.827500122 |
|          | MF | GO:0003755~peptidyl-prolyl cis-trans isomerase activity                                                                    | 7  | 0.014822576 | 3.417425228 |
|          | MF | GO:0001046~core promoter sequence-specific DNA binding                                                                     | 5  | 0.014956458 | 5.025625335 |
|          | MF | GO:0003735~structural constituent of ribosome                                                                              | 16 | 0.017806853 | 1.938964668 |
|          | MF | GO:0019825~oxygen binding                                                                                                  | 5  | 0.018359454 | 4.746423927 |
|          | MF | GO:0001222~transcription corepressor binding                                                                               | 5  | 0.018359454 | 4.746423927 |
|          | MF | GO:0008146~sulfotransferase activity                                                                                       | 6  | 0.018580909 | 3.797139142 |
|          | MF | GO:0004879~RNA polymerase II transcription factor activity, ligand-activated sequence-specific DNA binding                 | 8  | 0.022853796 | 2.78973488  |
|          | MF | GO:0005102~receptor binding                                                                                                | 14 | 0.036414969 | 1.868904421 |
|          | MF | GO:0003682~chromatin binding                                                                                               | 19 | 0.036726004 | 1.66489947  |
|          | MF | GO:0004896~cytokine receptor activity                                                                                      | 7  | 0.037633524 | 2.781625185 |
|          | MF | GO:0016887~ATPase activity                                                                                                 | 25 | 0.038780938 | 1.525636262 |
|          | MF | GO:0004497~monooxygenase activity                                                                                          | 5  | 0.042216921 | 3.714592639 |
|          | MF | GO:0020037~heme binding                                                                                                    | 12 | 0.045251492 | 1.934391638 |
| Paternal | BP | GO:0030866~cortical actin cytoskeleton organization                                                                        | 6  | 0.002545125 | 5.933611885 |
| line vs. | BP | GO:0008284~positive regulation of cell proliferation                                                                       | 18 | 0.004132833 | 2.150436522 |
| F1 cross | BP | GO:0006082~organic acid metabolic process                                                                                  | 6  | 0.004195423 | 5.340250696 |
|          | BP | GO:0002181~cytoplasmic translation                                                                                         | 7  | 0.007904906 | 3.893932799 |
|          | BP | GO:0006805~xenobiotic metabolic process                                                                                    | 8  | 0.010599168 | 3.236515574 |
|          | BP | GO:0008625~extrinsic apoptotic signaling pathway via death domain receptors                                                | 4  | 0.011447017 | 7.911482513 |

|          |    |                                                                                                                                                                                                        |    |             |             |
|----------|----|--------------------------------------------------------------------------------------------------------------------------------------------------------------------------------------------------------|----|-------------|-------------|
|          | BP | GO:0008219~cell death                                                                                                                                                                                  | 4  | 0.020674525 | 6.473031147 |
|          | BP | GO:0006412~translation                                                                                                                                                                                 | 13 | 0.026013916 | 2.029919855 |
|          | BP | GO:0055085~transmembrane transport                                                                                                                                                                     | 21 | 0.031677126 | 1.639550652 |
|          | BP | GO:0031295~T cell costimulation                                                                                                                                                                        | 4  | 0.032967653 | 5.477180201 |
|          | BP | GO:0001678~cellular glucose homeostasis                                                                                                                                                                | 4  | 0.032967653 | 5.477180201 |
|          | BP | GO:0006606~protein import into nucleus                                                                                                                                                                 | 8  | 0.036116849 | 2.542976522 |
|          | BP | GO:0042130~negative regulation of T cell proliferation                                                                                                                                                 | 4  | 0.040252869 | 5.085953044 |
|          | BP | GO:0042744~hydrogen peroxide catabolic process                                                                                                                                                         | 4  | 0.040252869 | 5.085953044 |
|          | BP | GO:0032874~positive regulation of stress-activated MAPK cascade                                                                                                                                        | 3  | 0.040539257 | 8.900417827 |
|          | BP | GO:0006952~defense response                                                                                                                                                                            | 6  | 0.044085126 | 3.051571827 |
|          | BP | GO:0033617~mitochondrial respiratory chain complex IV assembly                                                                                                                                         | 4  | 0.048276955 | 4.746889508 |
|          | CC | GO:0030141~secretory granule                                                                                                                                                                           | 7  | 0.005181377 | 4.244401213 |
|          | CC | GO:0005840~ribosome                                                                                                                                                                                    | 14 | 0.00593127  | 2.370746623 |
|          | CC | GO:0005615~extracellular space                                                                                                                                                                         | 63 | 0.006251384 | 1.394803225 |
|          | CC | GO:0043231~intracellular membrane-bounded organelle                                                                                                                                                    | 15 | 0.016808438 | 2.013925065 |
|          | CC | GO:0072562~blood microparticle                                                                                                                                                                         | 5  | 0.019373059 | 4.699158485 |
|          | MF | GO:0005506~iron ion binding                                                                                                                                                                            | 17 | 2.02E-04    | 2.922291994 |
|          | MF | GO:0020037~heme binding                                                                                                                                                                                | 16 | 7.09E-04    | 2.724445366 |
|          | MF | GO:0005504~fatty acid binding                                                                                                                                                                          | 6  | 0.004956746 | 5.156985871 |
|          | MF | GO:0005319~lipid transporter activity                                                                                                                                                                  | 5  | 0.007771085 | 6.016483516 |
|          | MF | GO:0016712~oxidoreductase activity, acting on paired donors, with incorporation or reduction of molecular oxygen, reduced flavin or flavoprotein as one donor, and incorporation of one atom of oxygen | 6  | 0.010779907 | 4.331868132 |
|          | MF | GO:0019825~oxygen binding                                                                                                                                                                              | 5  | 0.015269157 | 5.013736264 |
|          | MF | GO:0008430~selenium binding                                                                                                                                                                            | 3  | 0.017021027 | 13.53708791 |
|          | MF | GO:0003735~structural constituent of ribosome                                                                                                                                                          | 15 | 0.024242368 | 1.920154314 |
|          | MF | GO:0036094~small molecule binding                                                                                                                                                                      | 3  | 0.027334622 | 10.82967033 |
|          | MF | GO:0008395~steroid hydroxylase activity                                                                                                                                                                | 4  | 0.031812352 | 5.553677092 |
|          | MF | GO:0031731~CCR6 chemokine receptor binding                                                                                                                                                             | 4  | 0.038864099 | 5.156985871 |
| Paternal | BP | GO:0006955~immune response                                                                                                                                                                             | 22 | 1.68E-06    | 3.429341529 |
| line vs. | BP | GO:0055085~transmembrane transport                                                                                                                                                                     | 22 | 5.96E-05    | 2.722415863 |
| Mater-   | BP | GO:0045087~innate immune response                                                                                                                                                                      | 13 | 2.49E-04    | 3.595918279 |
| nal line | BP | GO:0042446~hormone biosynthetic process                                                                                                                                                                | 5  | 2.74E-04    | 14.10706402 |
|          | BP | GO:0051482~positive regulation of cytosolic calcium ion concentration involved in phospholipase C-activating G-protein coupled signaling pathway                                                       | 5  | 0.003182625 | 7.837257788 |
|          | BP | GO:0010594~regulation of endothelial cell migration                                                                                                                                                    | 3  | 0.003656145 | 28.21412804 |
|          | BP | GO:0043123~positive regulation of I-kappaB kinase/NF-kappaB signaling                                                                                                                                  | 9  | 0.004128984 | 3.478454141 |

|    |                                                                                                                                                                                                        |    |             |             |
|----|--------------------------------------------------------------------------------------------------------------------------------------------------------------------------------------------------------|----|-------------|-------------|
| BP | GO:0006805~xenobiotic metabolic process                                                                                                                                                                | 7  | 0.004272738 | 4.488611278 |
| BP | GO:0042448~progesterone metabolic process                                                                                                                                                              | 4  | 0.004378837 | 11.28565121 |
| BP | GO:0006278~RNA-dependent DNA biosynthetic process                                                                                                                                                      | 3  | 0.007141133 | 21.16059603 |
| BP | GO:1990830~cellular response to leukemia inhibitory factor                                                                                                                                             | 5  | 0.008010722 | 6.133506095 |
| BP | GO:0006954~inflammatory response                                                                                                                                                                       | 11 | 0.008485869 | 2.652610328 |
| BP | GO:0019886~antigen processing and presentation of exogenous peptide antigen via MHC class II                                                                                                           | 4  | 0.011956304 | 8.061179439 |
| BP | GO:0046677~response to antibiotic                                                                                                                                                                      | 4  | 0.014559304 | 7.523767476 |
| BP | GO:0006508~proteolysis                                                                                                                                                                                 | 18 | 0.01837831  | 1.846742926 |
| BP | GO:0050852~T cell receptor signaling pathway                                                                                                                                                           | 5  | 0.030969141 | 4.149136476 |
| BP | GO:0016477~cell migration                                                                                                                                                                              | 10 | 0.046371705 | 2.12136301  |
| CC | GO:0005887~integral component of plasma membrane                                                                                                                                                       | 30 | 1.50E-05    | 2.450853099 |
| CC | GO:0016020~membrane                                                                                                                                                                                    | 91 | 1.04E-04    | 1.473998576 |
| CC | GO:0016021~integral component of membrane                                                                                                                                                              | 83 | 9.54E-04    | 1.408327414 |
| CC | GO:0005576~extracellular region                                                                                                                                                                        | 33 | 9.73E-04    | 1.849363357 |
| CC | GO:0005615~extracellular space                                                                                                                                                                         | 45 | 0.002273453 | 1.589157398 |
| CC | GO:0042613~MHC class II protein complex                                                                                                                                                                | 4  | 0.008162256 | 9.225262433 |
| CC | GO:0009897~external side of plasma membrane                                                                                                                                                            | 13 | 0.015990831 | 2.189704145 |
| CC | GO:0005886~plasma membrane                                                                                                                                                                             | 74 | 0.018191549 | 1.283955796 |
| CC | GO:0005903~brush border                                                                                                                                                                                | 4  | 0.027398098 | 5.996420582 |
| CC | GO:0009986~cell surface                                                                                                                                                                                | 12 | 0.0397072   | 1.987763729 |
| CC | GO:0043020~NADPH oxidase complex                                                                                                                                                                       | 3  | 0.049823091 | 8.176937157 |
| MF | GO:0005506~iron ion binding                                                                                                                                                                            | 15 | 2.05E-05    | 4.002436796 |
| MF | GO:0004508~steroid 17-alpha-monooxygenase activity                                                                                                                                                     | 4  | 8.29E-04    | 18.67803838 |
| MF | GO:0047442~17-alpha-hydroxyprogesterone aldolase activity                                                                                                                                              | 4  | 8.29E-04    | 18.67803838 |
| MF | GO:0022857~transmembrane transporter activity                                                                                                                                                          | 11 | 0.001119853 | 3.502132196 |
| MF | GO:0038023~signaling receptor activity                                                                                                                                                                 | 9  | 0.007499368 | 3.151918977 |
| MF | GO:0008395~steroid hydroxylase activity                                                                                                                                                                | 4  | 0.009833991 | 8.620633098 |
| MF | GO:0016712~oxidoreductase activity, acting on paired donors, with incorporation or reduction of molecular oxygen, reduced flavin or flavoprotein as one donor, and incorporation of one atom of oxygen | 5  | 0.011093212 | 5.603411514 |
| MF | GO:0016491~oxidoreductase activity                                                                                                                                                                     | 10 | 0.011136349 | 2.720102677 |
| MF | GO:0020037~heme binding                                                                                                                                                                                | 10 | 0.013282589 | 2.643118639 |
| MF | GO:0003964~RNA-directed DNA polymerase activity                                                                                                                                                        | 3  | 0.017262867 | 14.00852878 |
| MF | GO:0004896~cytokine receptor activity                                                                                                                                                                  | 6  | 0.017729895 | 3.90935687  |
| MF | GO:0015267~channel activity                                                                                                                                                                            | 4  | 0.017791222 | 7.004264392 |
| MF | GO:0004888~transmembrane signaling receptor activity                                                                                                                                                   | 7  | 0.018099278 | 3.324057678 |
| MF | GO:0005507~copper ion binding                                                                                                                                                                          | 5  | 0.020909703 | 4.669509595 |
| MF | GO:0004715~non-membrane spanning protein tyrosine kinase activity                                                                                                                                      | 5  | 0.031678096 | 4.120155525 |
| MF | GO:0003953~NAD+ nucleosidase activity                                                                                                                                                                  | 4  | 0.041826884 | 5.094010467 |

|                     |    |                                                                                           |    |             |             |
|---------------------|----|-------------------------------------------------------------------------------------------|----|-------------|-------------|
| Enhancing dominance | MF | GO:0004497~monooxygenase activity                                                         | 4  | 0.046869109 | 4.872531751 |
|                     | BP | GO:0036089~cleavage furrow formation                                                      | 2  | 0.023248476 | 83.53594771 |
|                     | BP | GO:0045010~actin nucleation                                                               | 2  | 0.030879616 | 62.65196078 |
|                     | CC | -                                                                                         | -  | -           | -           |
|                     | MF | -                                                                                         | -  | -           | -           |
|                     | BP | GO:0008284~positive regulation of cell proliferation                                      | 6  | 8.83E-04    | 7.918017553 |
|                     | BP | GO:0010628~positive regulation of gene expression                                         | 5  | 0.008395575 | 6.144711538 |
|                     | BP | GO:0051781~positive regulation of cell division                                           | 3  | 0.008580156 | 21.06758242 |
|                     | BP | GO:0060394~negative regulation of pathway-restricted SMAD protein phosphorylation         | 2  | 0.014948365 | 131.0871795 |
|                     | BP | GO:0007605~sensory perception of sound                                                    | 3  | 0.0186868   | 14.04505495 |
| Over-dominance      | BP | GO:0000902~cell morphogenesis                                                             | 3  | 0.027875845 | 11.34408284 |
|                     | BP | GO:0009887~animal organ morphogenesis                                                     | 3  | 0.027875845 | 11.34408284 |
|                     | BP | GO:0016477~cell migration                                                                 | 4  | 0.028961634 | 5.913707345 |
|                     | BP | GO:0050768~negative regulation of neurogenesis                                            | 2  | 0.034537827 | 56.18021978 |
|                     | BP | GO:0090090~negative regulation of canonical Wnt signaling pathway                         | 3  | 0.045518689 | 8.674886878 |
|                     | CC | -                                                                                         | -  | -           | -           |
|                     | MF | GO:0003755~peptidyl-prolyl cis-trans isomerase activity                                   | 3  | 0.014461102 | 16.08979592 |
|                     | MF | GO:0004896~cytokine receptor activity                                                     | 3  | 0.021364995 | 13.09634551 |
|                     | BP | GO:0006413~translational initiation                                                       | 3  | 0.023098547 | 12.57972441 |
|                     | BP | GO:0006357~regulation of transcription from RNA polymerase II promoter                    | 17 | 0.026043815 | 1.785848142 |
| Under-dominance     | CC | GO:0034451~centriolar satellite                                                           | 3  | 0.037864602 | 9.653301321 |
|                     | CC | GO:1990909~Wnt signalosome                                                                | 2  | 0.043261199 | 45.0487395  |
|                     | CC | GO:0005856~cytoskeleton                                                                   | 6  | 0.04567523  | 3.057606753 |
|                     | MF | GO:0005515~protein binding                                                                | 32 | 0.004970608 | 1.627849356 |
|                     | MF | GO:0000978~RNA polymerase II core promoter proximal region sequence-specific DNA binding  | 14 | 0.020976336 | 2.007245112 |
|                     | MF | GO:0000981~RNA polymerase II transcription factor activity, sequence-specific DNA binding | 14 | 0.026595522 | 1.94214527  |
|                     | MF | GO:0004040~amidase activity                                                               | 2  | 0.028718256 | 68.4375     |
|                     | MF | GO:0017064~fatty acid amide hydrolase activity                                            | 2  | 0.047407635 | 41.0625     |
|                     | MF | GO:0005198~structural molecule activity                                                   | 4  | 0.047741299 | 4.888392857 |
|                     | BP | GO:0006412~translation                                                                    | 11 | 2.22E-06    | 7.384756802 |
| Under-dominance     | BP | GO:0032981~mitochondrial respiratory chain complex I assembly                             | 7  | 3.00E-06    | 16.74157934 |
|                     | BP | GO:0000122~negative regulation of transcription from RNA polymerase II promoter           | 15 | 2.24E-05    | 3.999979136 |
|                     | BP | GO:0006397~mRNA processing                                                                | 7  | 1.92E-04    | 8.242008291 |
|                     | BP | GO:0008380~RNA splicing                                                                   | 5  | 0.003690363 | 7.809483075 |

|    |                                                                                          |    |             |             |
|----|------------------------------------------------------------------------------------------|----|-------------|-------------|
| BP | GO:0003009~skeletal muscle contraction                                                   | 3  | 0.005685356 | 25.51097804 |
| BP | GO:0006357~regulation of transcription from RNA polymerase II promoter                   | 23 | 0.006305615 | 1.837429525 |
| BP | GO:0006260~DNA replication                                                               | 5  | 0.007609041 | 6.377744511 |
| BP | GO:0006281~DNA repair                                                                    | 6  | 0.008591153 | 4.733995926 |
| BP | GO:0009408~response to heat                                                              | 4  | 0.012098252 | 8.273830717 |
| BP | GO:0006457~protein folding                                                               | 5  | 0.021076363 | 4.724255193 |
| BP | GO:0070507~regulation of microtubule cytoskeleton organization                           | 3  | 0.022384332 | 12.75548902 |
| BP | GO:0042026~protein refolding                                                             | 3  | 0.024807287 | 12.08414749 |
| BP | GO:0010468~regulation of gene expression                                                 | 5  | 0.025606362 | 4.449589194 |
| BP | GO:0030433~ubiquitin-dependent ERAD pathway                                              | 4  | 0.025633196 | 6.24758646  |
| BP | GO:0008286~insulin receptor signaling pathway                                            | 3  | 0.029955405 | 10.9332763  |
| BP | GO:0006406~mRNA export from nucleus                                                      | 3  | 0.038388738 | 9.566616766 |
| BP | GO:0009952~anterior/posterior pattern specification                                      | 4  | 0.042976959 | 5.102195609 |
| BP | GO:0000398~mRNA splicing, via spliceosome                                                | 5  | 0.045119627 | 3.715190977 |
| CC | GO:0005634~nucleus                                                                       | 69 | 4.94E-08    | 1.858590528 |
| CC | GO:0005654~nucleoplasm                                                                   | 32 | 1.08E-07    | 2.916450187 |
| CC | GO:0005747~mitochondrial respiratory chain complex I                                     | 8  | 6.62E-07    | 15.49364162 |
| CC | GO:0005840~ribosome                                                                      | 9  | 8.98E-05    | 6.281206062 |
| CC | GO:0005829~cytosol                                                                       | 33 | 8.89E-04    | 1.820833951 |
| CC | GO:0005730~nucleolus                                                                     | 11 | 0.004151438 | 2.948616917 |
| CC | GO:0008180~COP9 signalosome                                                              | 3  | 0.015408038 | 15.49364162 |
| CC | GO:0000792~heterochromatin                                                               | 3  | 0.017462233 | 14.52528902 |
| CC | GO:0005739~mitochondrion                                                                 | 14 | 0.036569393 | 1.866703809 |
| CC | GO:0005743~mitochondrial inner membrane                                                  | 6  | 0.039010515 | 3.205581025 |
| CC | GO:0016607~nuclear speck                                                                 | 6  | 0.039010515 | 3.205581025 |
| CC | GO:0001650~fibrillar center                                                              | 4  | 0.048993032 | 4.841763006 |
| MF | GO:0003723~RNA binding                                                                   | 19 | 1.91E-05    | 3.264425529 |
| MF | GO:0003677~DNA binding                                                                   | 20 | 4.37E-05    | 2.94622137  |
| MF | GO:0003735~structural constituent of ribosome                                            | 10 | 5.06E-05    | 5.86109996  |
| MF | GO:0003682~chromatin binding                                                             | 11 | 1.23E-04    | 4.661828737 |
| MF | GO:0051082~unfolded protein binding                                                      | 7  | 1.91E-04    | 8.264150943 |
| MF | GO:0051087~chaperone binding                                                             | 6  | 3.89E-04    | 9.535558781 |
| MF | GO:0051879~Hsp90 protein binding                                                         | 4  | 0.001935013 | 15.74123989 |
| MF | GO:0030544~Hsp70 protein binding                                                         | 4  | 0.002868025 | 13.77358491 |
| MF | GO:0003729~mRNA binding                                                                  | 8  | 0.004050245 | 3.958874703 |
| MF | GO:0000978~RNA polymerase II core promoter proximal region sequence-specific DNA binding | 18 | 0.005616122 | 2.077579846 |
| MF | GO:0003713~transcription coactivator activity                                            | 6  | 0.008355888 | 4.76777939  |
| MF | GO:0003690~double-stranded DNA binding                                                   | 4  | 0.015757985 | 7.512864494 |
| MF | GO:0015459~potassium channel regulator activity                                          | 3  | 0.025977808 | 11.80592992 |

|    |                                              |   |             |             |
|----|----------------------------------------------|---|-------------|-------------|
| MF | GO:0030911~TPR domain binding                | 2 | 0.035643723 | 55.09433962 |
| MF | GO:0048306~calcium-dependent protein binding | 3 | 0.038668532 | 9.535558781 |

‘ – ’ means no significantly enriched was observed in the present gene set.

Table S3. Significantly enriched pathways of different gene sets in the breast muscle.

| Gene set                        | Pathway                                               | Gene count | p-value     | Fold enrichment |
|---------------------------------|-------------------------------------------------------|------------|-------------|-----------------|
| Maternal line vs. F1 cross      | gga04512:ECM-receptor interaction                     | 13         | 0.006112063 | 2.43922086      |
|                                 | gga03010:Ribosome                                     | 16         | 0.010593163 | 2.042424529     |
|                                 | gga03250:Viral life cycle - HIV-1                     | 8          | 0.042162606 | 2.442899927     |
|                                 | gga03320:PPAR signaling pathway                       | 9          | 0.046223775 | 2.224783862     |
| Paternal line vs. F1 cross      | gga02010:ABC transporters                             | 8          | 0.009244764 | 3.295121951     |
|                                 | gga03320:PPAR signaling pathway                       | 10         | 0.010920518 | 2.680555556     |
|                                 | gga03010:Ribosome                                     | 15         | 0.012164707 | 2.076331967     |
| Paternal line vs. Maternal line | gga04145:Phagosome                                    | 15         | 4.57E-04    | 2.96336916      |
|                                 | gga04512:ECM-receptor interaction                     | 10         | 0.002621141 | 3.356104832     |
|                                 | gga01100:Metabolic pathways                           | 66         | 0.005143418 | 1.342932233     |
|                                 | gga00380:Tryptophan metabolism                        | 6          | 0.009491695 | 4.517135692     |
|                                 | gga00260:Glycine, serine and threonine metabolism     | 6          | 0.009491695 | 4.517135692     |
|                                 | gga04148:Efferocytosis                                | 12         | 0.013451261 | 2.321305842     |
|                                 | gga00120:Primary bile acid biosynthesis               | 4          | 0.014858365 | 7.428178694     |
|                                 | gga04672:Intestinal immune network for IgA production | 5          | 0.0380856   | 3.86884307      |
| Enhancing dominance             | -                                                     | -          | -           | -               |
| Suppressing dominance           | gga04350:TGF-beta signaling pathway                   | 4          | 0.025495457 | 6.054901961     |
|                                 | gga03250:Viral life cycle - HIV-1                     | 3          | 0.038277518 | 9.349480969     |
| Over-dominance                  | -                                                     | -          | -           | -               |
| Under-dominance                 | gga00190:Oxidative phosphorylation                    | 11         | 1.10E-06    | 7.668214654     |
|                                 | gga03010:Ribosome                                     | 10         | 4.06E-05    | 5.828300259     |
|                                 | gga03013:Nucleocytoplasmic transport                  | 8          | 2.73E-04    | 6.116581777     |
|                                 | gga03040:Spliceosome                                  | 8          | 9.89E-04    | 4.946453089     |
|                                 | gga03015:mRNA surveillance pathway                    | 6          | 0.003649313 | 5.688421053     |
|                                 | gga04141:Protein processing in endoplasmic reticulum  | 7          | 0.01727869  | 3.318245614     |
|                                 | gga04150:mTOR signaling pathway                       | 6          | 0.048844595 | 2.962719298     |

‘ – ’ means no significantly enriched pathway was detected in this gene set.

Table S4. Significantly enriched GO terms of different gene sets in the liver.

| Gene set                         | Cat-<br>e-<br>gory | Term                                                                            | Gene<br>count | p-value     | Fold En-<br>richment |
|----------------------------------|--------------------|---------------------------------------------------------------------------------|---------------|-------------|----------------------|
| Maternal line<br>vs. F1<br>cross | BP                 | GO:0006936~muscle contraction                                                   | 10            | 4.46E-05    | 5.317661743          |
|                                  | BP                 | GO:0000122~negative regulation of transcription from RNA polymerase II promoter | 44            | 7.20E-05    | 1.875077939          |
|                                  | BP                 | GO:0006397~mRNA processing                                                      | 14            | 0.002007846 | 2.634287817          |
|                                  | BP                 | GO:0006805~xenobiotic metabolic process                                         | 11            | 0.002415507 | 3.057655502          |
|                                  | BP                 | GO:0045944~positive regulation of transcription from RNA polymerase II promoter | 46            | 0.00263323  | 1.562801701          |
|                                  | BP                 | GO:0030239~myofibril assembly                                                   | 6             | 0.002657331 | 5.644902466          |
|                                  | BP                 | GO:0048536~spleen development                                                   | 6             | 0.003858239 | 5.241695147          |
|                                  | BP                 | GO:0051897~positive regulation of protein kinase B signaling                    | 9             | 0.004232471 | 3.335624184          |
|                                  | BP                 | GO:0007519~skeletal muscle tissue development                                   | 7             | 0.005454323 | 4.076874003          |
|                                  | BP                 | GO:0008380~RNA splicing                                                         | 11            | 0.005516838 | 2.745649839          |
|                                  | BP                 | GO:0006749~glutathione metabolic process                                        | 8             | 0.006123765 | 3.494463431          |
|                                  | BP                 | GO:0009952~anterior/posterior pattern specification                             | 12            | 0.008554739 | 2.446124402          |
|                                  | BP                 | GO:0031204~posttranslational protein targeting to membrane, translocation       | 4             | 0.009005561 | 8.153748006          |
|                                  | BP                 | GO:0001709~cell fate determination                                              | 4             | 0.009005561 | 8.153748006          |
|                                  | BP                 | GO:0006412~translation                                                          | 18            | 0.010968807 | 1.931150844          |
|                                  | BP                 | GO:0006281~DNA repair                                                           | 16            | 0.011845394 | 2.017422187          |
|                                  | BP                 | GO:0002181~cytoplasmic translation                                              | 8             | 0.013083877 | 3.057655502          |
|                                  | BP                 | GO:0001756~somitogenesis                                                        | 7             | 0.013447089 | 3.424574163          |
|                                  | BP                 | GO:0042127~regulation of cell proliferation                                     | 12            | 0.013788216 | 2.293241627          |
|                                  | BP                 | GO:0006357~regulation of transcription from RNA polymerase II promoter          | 98            | 0.014721606 | 1.251149224          |
|                                  | BP                 | GO:0031954~positive regulation of protein autophosphorylation                   | 4             | 0.014809328 | 6.988926863          |
|                                  | BP                 | GO:0043066~negative regulation of apoptotic process                             | 20            | 0.016825608 | 1.772553914          |
|                                  | BP                 | GO:0001837~epithelial to mesenchymal transition                                 | 5             | 0.017400786 | 4.704085388          |
|                                  | BP                 | GO:0006635~fatty acid beta-oxidation                                            | 7             | 0.019551423 | 3.170902002          |
|                                  | BP                 | GO:0016055~Wnt signaling pathway                                                | 12            | 0.021140813 | 2.158345061          |
|                                  | BP                 | GO:0035721~intracellular retrograde transport                                   | 4             | 0.022272445 | 6.115311005          |
|                                  | BP                 | GO:0000381~regulation of alternative mRNA splicing, via spliceosome             | 9             | 0.024403264 | 2.501718138          |
|                                  | BP                 | GO:0048704~embryonic skeletal system morphogenesis                              | 7             | 0.027308842 | 2.952219106          |
|                                  | BP                 | GO:0061512~protein localization to cilium                                       | 5             | 0.029150575 | 4.076874003          |



|    |                                                                                             |     |             |             |
|----|---------------------------------------------------------------------------------------------|-----|-------------|-------------|
| BP | GO:0010718~positive regulation of epithelial to mesenchymal transition                      | 6   | 0.02941453  | 3.335624184 |
| BP | GO:0030198~extracellular matrix organization                                                | 13  | 0.030978306 | 1.962939335 |
| BP | GO:0043525~positive regulation of neuron apoptotic process                                  | 4   | 0.031412274 | 5.435832004 |
| BP | GO:0045736~negative regulation of cyclin-dependent protein serine/threonine kinase activity | 4   | 0.031412274 | 5.435832004 |
| BP | GO:0008284~positive regulation of cell proliferation                                        | 20  | 0.034436012 | 1.641694229 |
| BP | GO:0060021~palate development                                                               | 6   | 0.035136234 | 3.190597046 |
| BP | GO:0032760~positive regulation of tumor necrosis factor production                          | 6   | 0.035136234 | 3.190597046 |
| BP | GO:0003406~retinal pigment epithelium development                                           | 3   | 0.03578244  | 9.172966507 |
| BP | GO:0035195~gene silencing by miRNA                                                          | 3   | 0.03578244  | 9.172966507 |
| BP | GO:0000398~mRNA splicing, via spliceosome                                                   | 15  | 0.040237873 | 1.781158545 |
| BP | GO:0042733~embryonic digit morphogenesis                                                    | 6   | 0.041498437 | 3.057655502 |
| BP | GO:0001654~eye development                                                                  | 5   | 0.044641572 | 3.597241768 |
| BP | GO:0007155~cell adhesion                                                                    | 21  | 0.048307468 | 1.556624619 |
| CC | GO:0031012~extracellular matrix                                                             | 26  | 1.80E-04    | 2.255177591 |
| CC | GO:0030016~myofibril                                                                        | 8   | 0.001020664 | 4.668059909 |
| CC | GO:0005840~ribosome                                                                         | 19  | 0.002216868 | 2.197352525 |
| CC | GO:0005634~nucleus                                                                          | 260 | 0.003549572 | 1.160522544 |
| CC | GO:0090575~RNA polymerase II transcription factor complex                                   | 10  | 0.010722525 | 2.674409323 |
| CC | GO:0000785~chromatin                                                                        | 19  | 0.014787469 | 1.833880679 |
| CC | GO:0005844~polysome                                                                         | 6   | 0.020128575 | 3.667761357 |
| CC | GO:0005581~collagen trimer                                                                  | 7   | 0.022081512 | 3.098625974 |
| CC | GO:0005615~extracellular space                                                              | 83  | 0.023511064 | 1.254987838 |
| CC | GO:0030018~Z disc                                                                           | 10  | 0.030876597 | 2.252134167 |
| CC | GO:0000792~heterochromatin                                                                  | 5   | 0.031174212 | 4.011613985 |
| CC | GO:0042788~polysomal ribosome                                                               | 5   | 0.031174212 | 4.011613985 |
| CC | GO:0034663~endoplasmic reticulum chaperone complex                                          | 3   | 0.032656166 | 9.627873563 |
| CC | GO:0030864~cortical actin cytoskeleton                                                      | 7   | 0.034576238 | 2.808129789 |
| CC | GO:0005654~nucleoplasm                                                                      | 81  | 0.041043533 | 1.223306288 |
| CC | GO:0005730~nucleolus                                                                        | 32  | 0.042396451 | 1.421416166 |
| CC | GO:0005783~endoplasmic reticulum                                                            | 45  | 0.043371837 | 1.32798256  |
| MF | GO:0005509~calcium ion binding                                                              | 68  | 5.62E-04    | 1.514055749 |
| MF | GO:0008013~beta-catenin binding                                                             | 11  | 0.001353196 | 3.285522697 |
| MF | GO:0045159~myosin II binding                                                                | 5   | 0.002360191 | 7.653774464 |
| MF | GO:0070888~E-box binding                                                                    | 8   | 0.003063048 | 3.918732526 |
| MF | GO:0008307~structural constituent of muscle                                                 | 5   | 0.006200744 | 6.123019571 |
| MF | GO:0004364~glutathione transferase activity                                                 | 7   | 0.006950108 | 3.896467    |
| MF | GO:0003682~chromatin binding                                                                | 27  | 0.008726147 | 1.69560542  |
| MF | GO:0003735~structural constituent of ribosome                                               | 21  | 0.010462048 | 1.82387817  |

|                                  |    |                                                                                 |    |             |             |
|----------------------------------|----|---------------------------------------------------------------------------------|----|-------------|-------------|
|                                  | MF | GO:0001222~transcription corepressor binding                                    | 6  | 0.012491919 | 4.082013048 |
|                                  | MF | GO:0005523~tropomyosin binding                                                  | 5  | 0.01281073  | 5.102516309 |
|                                  | MF | GO:0003714~transcription corepressor activity                                   | 16 | 0.014027002 | 1.979157841 |
|                                  | MF | GO:0048306~calcium-dependent protein binding                                    | 7  | 0.016214419 | 3.297010538 |
|                                  | MF | GO:0005516~calmodulin binding                                                   | 15 | 0.018191558 | 1.975167604 |
|                                  | MF | GO:0097100~supercoiled DNA binding                                              | 3  | 0.018867021 | 12.24603914 |
|                                  | MF | GO:0003723~RNA binding                                                          | 52 | 0.031402029 | 1.323896124 |
|                                  | MF | GO:0004497~monooxygenase activity                                               | 6  | 0.034977696 | 3.194618907 |
|                                  | MF | GO:0020037~heme binding                                                         | 15 | 0.049023541 | 1.732930067 |
| Paternal<br>line vs.<br>F1 cross | BP | GO:0006635~fatty acid beta-oxidation                                            | 10 | 2.45E-06    | 7.81139225  |
|                                  | BP | GO:0000122~negative regulation of transcription from RNA polymerase II promoter | 33 | 5.79E-06    | 2.425069859 |
|                                  | BP | GO:0006633~fatty acid biosynthetic process                                      | 8  | 1.54E-04    | 6.489464331 |
|                                  | BP | GO:0048536~spleen development                                                   | 5  | 0.00340196  | 7.532413956 |
|                                  | BP | GO:0030308~negative regulation of cell growth                                   | 7  | 0.004071429 | 4.47379738  |
|                                  | BP | GO:0006805~xenobiotic metabolic process                                         | 8  | 0.004281436 | 3.834683468 |
|                                  | BP | GO:0055091~phospholipid homeostasis                                             | 4  | 0.004942781 | 10.54537954 |
|                                  | BP | GO:0030199~collagen fibril organization                                         | 5  | 0.010915998 | 5.550199757 |
|                                  | BP | GO:0090336~positive regulation of brown fat cell differentiation                | 3  | 0.012593353 | 15.81806931 |
|                                  | BP | GO:0071230~cellular response to amino acid stimulus                             | 5  | 0.013144356 | 5.272689769 |
|                                  | BP | GO:0008584~male gonad development                                               | 7  | 0.013474446 | 3.515126513 |
|                                  | BP | GO:0042632~cholesterol homeostasis                                              | 7  | 0.013474446 | 3.515126513 |
|                                  | BP | GO:0010951~negative regulation of endopeptidase activity                        | 6  | 0.016304697 | 3.954517327 |
|                                  | BP | GO:0046890~regulation of lipid biosynthetic process                             | 3  | 0.020333957 | 12.65445545 |
|                                  | BP | GO:0030855~epithelial cell differentiation                                      | 5  | 0.024841818 | 4.393908141 |
|                                  | BP | GO:0008585~female gonad development                                             | 4  | 0.025995552 | 6.025931165 |
|                                  | BP | GO:0034097~response to cytokine                                                 | 4  | 0.025995552 | 6.025931165 |
|                                  | BP | GO:0008380~RNA splicing                                                         | 7  | 0.027248295 | 3.012965582 |
|                                  | BP | GO:0000038~very long-chain fatty acid metabolic process                         | 3  | 0.029553038 | 10.54537954 |
|                                  | BP | GO:1901223~negative regulation of NIK/NF-kappaB signaling                       | 3  | 0.029553038 | 10.54537954 |
|                                  | BP | GO:0006953~acute-phase response                                                 | 3  | 0.040093748 | 9.038896747 |
|                                  | BP | GO:0031954~positive regulation of protein autophosphorylation                   | 3  | 0.040093748 | 9.038896747 |
|                                  | BP | GO:0051781~positive regulation of cell division                                 | 5  | 0.041295727 | 3.766206978 |
|                                  | BP | GO:0006749~glutathione metabolic process                                        | 5  | 0.041295727 | 3.766206978 |
|                                  | BP | GO:0001649~osteoblast differentiation                                           | 6  | 0.042969638 | 3.086452548 |
|                                  | BP | GO:0048704~embryonic skeletal system morphogenesis                              | 5  | 0.046175326 | 3.636337772 |
|                                  | CC | GO:0005615~extracellular space                                                  | 72 | 3.62E-07    | 1.86322192  |
|                                  | CC | GO:0031012~extracellular matrix                                                 | 18 | 3.98E-04    | 2.672086841 |
|                                  | CC | GO:0005576~extracellular region                                                 | 39 | 0.004260237 | 1.601587253 |

|                                 |    |                                                                                                                            |    |             |             |
|---------------------------------|----|----------------------------------------------------------------------------------------------------------------------------|----|-------------|-------------|
|                                 | CC | GO:0070062~extracellular exosome                                                                                           | 9  | 0.010671263 | 2.951260093 |
|                                 | CC | GO:0034364~high-density lipoprotein particle                                                                               | 3  | 0.018811262 | 13.18229508 |
|                                 | CC | GO:0045277~respiratory chain complex IV                                                                                    | 3  | 0.037185069 | 9.415925059 |
|                                 | CC | GO:0005777~peroxisome                                                                                                      | 7  | 0.037792677 | 2.796244411 |
|                                 | CC | GO:0030018~Z disc                                                                                                          | 7  | 0.0438919   | 2.698130572 |
|                                 | MF | GO:0008083~growth factor activity                                                                                          | 13 | 0.004475269 | 2.575305292 |
|                                 | MF | GO:0001222~transcription corepressor binding                                                                               | 5  | 0.007986555 | 6.053067993 |
|                                 | MF | GO:0008013~beta-catenin binding                                                                                            | 7  | 0.010337131 | 3.720422279 |
|                                 | MF | GO:0005507~copper ion binding                                                                                              | 6  | 0.010927521 | 4.358208955 |
|                                 | MF | GO:0003857~3-hydroxyacyl-CoA dehydrogenase activity                                                                        | 3  | 0.011821192 | 16.34328358 |
|                                 | MF | GO:0005504~fatty acid binding                                                                                              | 5  | 0.014013688 | 5.188343994 |
|                                 | MF | GO:0004364~glutathione transferase activity                                                                                | 5  | 0.01652123  | 4.952510176 |
|                                 | MF | GO:0001228~transcriptional activator activity, RNA polymerase II transcription regulatory region sequence-specific binding | 16 | 0.025057778 | 1.864474419 |
|                                 | MF | GO:0008327~methyl-CpG binding                                                                                              | 3  | 0.037750563 | 9.33901919  |
|                                 | MF | GO:0015078~hydrogen ion transmembrane transporter activity                                                                 | 4  | 0.046751616 | 4.842454395 |
|                                 | MF | GO:0045159~myosin II binding                                                                                               | 3  | 0.048831631 | 8.171641791 |
|                                 | MF | GO:0004861~cyclin-dependent protein serine/threonine kinase inhibitor activity                                             | 3  | 0.048831631 | 8.171641791 |
| Paternal line vs. Maternal line | BP | GO:0042773~ATP synthesis coupled electron transport                                                                        | 4  | 1.82E-04    | 31.21123321 |
|                                 | BP | GO:0006120~mitochondrial electron transport, NADH to ubiquinone                                                            | 5  | 0.001084612 | 10.64019314 |
|                                 | BP | GO:0061844~antimicrobial humoral immune response mediated by antimicrobial peptide                                         | 4  | 0.006138659 | 10.4037444  |
|                                 | BP | GO:0006952~defense response                                                                                                | 5  | 0.006253027 | 6.688121402 |
|                                 | BP | GO:0009952~anterior/posterior pattern specification                                                                        | 6  | 0.008859288 | 4.681684982 |
|                                 | BP | GO:0006936~muscle contraction                                                                                              | 4  | 0.012321379 | 8.142060838 |
|                                 | BP | GO:0051146~striated muscle cell differentiation                                                                            | 3  | 0.014717896 | 15.60561661 |
|                                 | BP | GO:0046834~lipid phosphorylation                                                                                           | 3  | 0.014717896 | 15.60561661 |
|                                 | BP | GO:0035556~intracellular signal transduction                                                                               | 13 | 0.016017923 | 2.18927715  |
|                                 | BP | GO:0006281~DNA repair                                                                                                      | 7  | 0.017338672 | 3.378535554 |
|                                 | BP | GO:0042116~macrophage activation                                                                                           | 3  | 0.018141395 | 14.04505495 |
|                                 | BP | GO:0046339~diacylglycerol metabolic process                                                                                | 3  | 0.018141395 | 14.04505495 |
|                                 | BP | GO:0050829~defense response to Gram-negative bacterium                                                                     | 4  | 0.019122668 | 6.935829602 |
|                                 | BP | GO:0051216~cartilage development                                                                                           | 4  | 0.019122668 | 6.935829602 |
|                                 | BP | GO:0022904~respiratory electron transport chain                                                                            | 3  | 0.021864863 | 12.76823177 |
|                                 | BP | GO:0019835~cytolysis                                                                                                       | 3  | 0.021864863 | 12.76823177 |
|                                 | BP | GO:0032981~mitochondrial respiratory chain complex I assembly                                                              | 4  | 0.03001266  | 5.852106227 |
|                                 | BP | GO:0007205~protein kinase C-activating G-protein coupled                                                                   | 3  | 0.030155286 | 10.80388842 |

|                     |    |                                                                                  |    |             |             |
|---------------------|----|----------------------------------------------------------------------------------|----|-------------|-------------|
|                     |    | receptor signaling pathway                                                       |    |             |             |
|                     | BP | GO:0051897~positive regulation of protein kinase B signaling                     | 4  | 0.032508771 | 5.674769675 |
|                     | BP | GO:0030900~forebrain development                                                 | 3  | 0.034695184 | 10.0321821  |
|                     | BP | GO:0006468~protein phosphorylation                                               | 16 | 0.035233922 | 1.783499041 |
|                     | BP | GO:0032332~positive regulation of chondrocyte differentiation                    | 3  | 0.039480909 | 9.363369963 |
|                     | BP | GO:0044342~type B pancreatic cell proliferation                                  | 2  | 0.042111903 | 46.81684982 |
|                     | BP | GO:0051673~membrane disruption in other organism                                 | 2  | 0.042111903 | 46.81684982 |
|                     | BP | GO:0072498~embryonic skeletal joint development                                  | 2  | 0.042111903 | 46.81684982 |
|                     | CC | GO:0070469~respiratory chain                                                     | 6  | 1.63E-06    | 25.92263056 |
|                     | CC | GO:0005615~extracellular space                                                   | 35 | 2.08E-04    | 1.959209416 |
|                     | CC | GO:0005743~mitochondrial inner membrane                                          | 11 | 9.60E-04    | 3.605331377 |
|                     | CC | GO:0005576~extracellular region                                                  | 23 | 0.002050693 | 2.043123219 |
|                     | CC | GO:0033018~sarcoplasmic reticulum lumen                                          | 3  | 0.002556102 | 35.64361702 |
|                     | CC | GO:0005747~mitochondrial respiratory chain complex I                             | 5  | 0.009555574 | 5.940602837 |
|                     | MF | GO:0008137~NADH dehydrogenase (ubiquinone) activity                              | 6  | 2.13E-05    | 16.50408206 |
|                     | MF | GO:0005178~integrin binding                                                      | 7  | 0.004576124 | 4.483985765 |
|                     | MF | GO:0008083~growth factor activity                                                | 8  | 0.009132432 | 3.400841152 |
|                     | MF | GO:0048306~calcium-dependent protein binding                                     | 4  | 0.017326167 | 7.194087052 |
|                     | MF | GO:0004143~diacylglycerol kinase activity                                        | 3  | 0.021919311 | 12.75315432 |
|                     | MF | GO:0045505~dynein intermediate chain binding                                     | 4  | 0.023241311 | 6.44987115  |
|                     | MF | GO:0005507~copper ion binding                                                    | 4  | 0.025426579 | 6.234875445 |
|                     | MF | GO:0001530~lipopolysaccharide binding                                            | 3  | 0.039576009 | 9.352313167 |
|                     | MF | GO:0004674~protein serine/threonine kinase activity                              | 10 | 0.041020873 | 2.174956551 |
|                     | MF | GO:0004672~protein kinase activity                                               | 8  | 0.044174367 | 2.461135044 |
|                     | MF | GO:0005509~calcium ion binding                                                   | 19 | 0.047084573 | 1.615399547 |
|                     | MF | GO:0004553~hydrolase activity, hydrolyzing O-glycosyl compounds                  | 3  | 0.049858323 | 8.25204103  |
| Enhancing dominance | BP | GO:0031167~rRNA methylation                                                      | 4  | 0.002904465 | 13.04183673 |
|                     | BP | GO:0070536~protein K63-linked deubiquitination                                   | 4  | 0.009830315 | 8.694557823 |
|                     | BP | GO:0006396~RNA processing                                                        | 5  | 0.019385576 | 4.794792917 |
|                     | BP | GO:0045197~establishment or maintenance of epithelial cell apical/basal polarity | 4  | 0.025103996 | 6.210398445 |
|                     | BP | GO:0017148~negative regulation of translation                                    | 5  | 0.025711573 | 4.406025924 |
|                     | BP | GO:0051145~smooth muscle cell differentiation                                    | 3  | 0.029147483 | 10.86819728 |
|                     | BP | GO:0018105~peptidyl-serine phosphorylation                                       | 8  | 0.033568879 | 2.608367347 |
|                     | BP | GO:0006888~ER to Golgi vesicle-mediated transport                                | 7  | 0.033776489 | 2.889014467 |
|                     | BP | GO:0032727~positive regulation of interferon-alpha production                    | 3  | 0.035708238 | 9.781377551 |
|                     | BP | GO:0001934~positive regulation of protein phosphorylation                        | 6  | 0.038411008 | 3.207009033 |
|                     | BP | GO:0051894~positive regulation of focal adhesion assembly                        | 3  | 0.042775923 | 8.89216141  |

|                                    |    |                                                                 |    |             |             |
|------------------------------------|----|-----------------------------------------------------------------|----|-------------|-------------|
|                                    | BP | GO:0035904~aorta development                                    | 3  | 0.042775923 | 8.89216141  |
|                                    | CC | GO:0005829~cytosol                                              | 67 | 7.47E-05    | 1.619124382 |
|                                    | CC | GO:0005654~nucleoplasm                                          | 40 | 0.003768035 | 1.596664185 |
|                                    | CC | GO:0005739~mitochondrion                                        | 29 | 0.007131555 | 1.693535807 |
|                                    | CC | GO:0030117~membrane coat                                        | 4  | 0.017219926 | 7.142971352 |
|                                    | CC | GO:0031313~extrinsic component of endosome membrane             | 3  | 0.021465237 | 12.72341772 |
|                                    | CC | GO:1990904~ribonucleoprotein complex                            | 7  | 0.024178547 | 3.125049967 |
|                                    | CC | GO:0005622~intracellular                                        | 5  | 0.026912913 | 4.349886401 |
|                                    | CC | GO:0005737~cytoplasm                                            | 95 | 0.048291803 | 1.180683452 |
|                                    | MF | GO:0003723~RNA binding                                          | 32 | 2.01E-05    | 2.324943602 |
|                                    | MF | GO:0005524~ATP binding                                          | 50 | 0.00157391  | 1.564315511 |
|                                    | MF | GO:0030371~translation repressor activity                       | 4  | 0.005329163 | 10.75286416 |
|                                    | MF | GO:0035091~phosphatidylinositol binding                         | 7  | 0.015659459 | 3.445459994 |
|                                    | MF | GO:0016853~isomerase activity                                   | 3  | 0.020295885 | 13.10505319 |
|                                    | MF | GO:0004843~thiol-dependent ubiquitin-specific protease activity | 7  | 0.02125528  | 3.218784994 |
|                                    | MF | GO:0016491~oxidoreductase activity                              | 8  | 0.027925229 | 2.714315224 |
|                                    | MF | GO:0004674~protein serine/threonine kinase activity             | 12 | 0.044427243 | 1.950519545 |
|                                    | MF | GO:0008289~lipid binding                                        | 6  | 0.046887378 | 3.038852914 |
|                                    | MF | GO:0045505~dynein intermediate chain binding                    | 4  | 0.048721968 | 4.82024945  |
| Sup-<br>pressing<br>domi-<br>nance | BP | GO:0006412~translation                                          | 13 | 9.38E-06    | 5.060702973 |
|                                    | BP | GO:0001525~angiogenesis                                         | 10 | 1.55E-04    | 5.043008207 |
|                                    | BP | GO:0048536~spleen development                                   | 4  | 0.003394183 | 12.67956349 |
|                                    | BP | GO:0010951~negative regulation of endopeptidase activity        | 5  | 0.005456158 | 6.934136285 |
|                                    | BP | GO:0032729~positive regulation of interferon-gamma production   | 4  | 0.012580281 | 8.068813131 |
|                                    | BP | GO:0002250~adaptive immune response                             | 5  | 0.013131987 | 5.412008808 |
|                                    | BP | GO:0008584~male gonad development                               | 5  | 0.014264204 | 5.283151455 |
|                                    | BP | GO:0030324~lung development                                     | 4  | 0.015999193 | 7.396412037 |
|                                    | BP | GO:0032092~positive regulation of protein binding               | 4  | 0.019889001 | 6.827457265 |
|                                    | BP | GO:0032148~activation of protein kinase B activity              | 3  | 0.033292808 | 10.2411859  |
|                                    | BP | GO:0097009~energy homeostasis                                   | 3  | 0.033292808 | 10.2411859  |
|                                    | BP | GO:0002181~cytoplasmic translation                              | 4  | 0.0344021   | 5.547309028 |
|                                    | BP | GO:0001503~ossification                                         | 4  | 0.0344021   | 5.547309028 |
|                                    | BP | GO:0032981~mitochondrial respiratory chain complex I assembly   | 4  | 0.0344021   | 5.547309028 |
|                                    | BP | GO:0060173~limb development                                     | 4  | 0.0344021   | 5.547309028 |
|                                    | BP | GO:0008585~female gonad development                             | 3  | 0.038275913 | 9.509672619 |
|                                    | BP | GO:0007507~heart development                                    | 6  | 0.038780449 | 3.208082329 |
|                                    | BP | GO:0030216~keratinocyte differentiation                         | 3  | 0.043522537 | 8.875694444 |
|                                    | BP | GO:0032332~positive regulation of chondrocyte differentiation   | 3  | 0.043522537 | 8.875694444 |

|                |    |                                                           |     |             |             |
|----------------|----|-----------------------------------------------------------|-----|-------------|-------------|
|                | BP | GO:0070374~positive regulation of ERK1 and ERK2 cascade   | 6   | 0.044106255 | 3.096172481 |
|                | BP | GO:0006954~inflammatory response                          | 7   | 0.048229621 | 2.65512227  |
|                | CC | GO:0005840~ribosome                                       | 15  | 1.16E-07    | 6.223646327 |
|                | CC | GO:0022625~cytosolic large ribosomal subunit              | 9   | 4.69E-06    | 9.210996564 |
|                | CC | GO:0005615~extracellular space                            | 40  | 6.47E-06    | 2.169846069 |
|                | CC | GO:0005576~extracellular region                           | 24  | 0.001383759 | 2.066017921 |
|                | CC | GO:0005764~lysosome                                       | 8   | 0.010369488 | 3.319278041 |
|                | CC | GO:0005747~mitochondrial respiratory chain complex I      | 5   | 0.010641182 | 5.756872852 |
|                | CC | GO:0014704~intercalated disc                              | 3   | 0.018722894 | 13.81649485 |
|                | CC | GO:0022627~cytosolic small ribosomal subunit              | 4   | 0.02883545  | 5.942578428 |
|                | CC | GO:0030018~Z disc                                         | 5   | 0.034644413 | 4.039910773 |
|                | MF | GO:0003735~structural constituent of ribosome             | 19  | 7.35E-10    | 6.462183569 |
|                | MF | GO:0004867~serine-type endopeptidase inhibitor activity   | 7   | 0.002080626 | 5.245209854 |
|                | MF | GO:0003723~RNA binding                                    | 18  | 0.02323435  | 1.794618875 |
|                | MF | GO:0019834~phospholipase A2 inhibitor activity            | 2   | 0.041122407 | 47.95620438 |
|                | MF | GO:0004859~phospholipase inhibitor activity               | 2   | 0.041122407 | 47.95620438 |
|                | MF | GO:0031683~G-protein beta/gamma-subunit complex binding   | 3   | 0.042609343 | 8.991788321 |
| Over-dominance | BP | GO:0006635~fatty acid beta-oxidation                      | 13  | 4.39E-08    | 7.282621083 |
|                | BP | GO:0030488~tRNA methylation                               | 7   | 0.001048769 | 5.572531922 |
|                | BP | GO:0044208~'de novo' AMP biosynthetic process             | 4   | 0.002594158 | 12.10035503 |
|                | BP | GO:0007031~peroxisome organization                        | 4   | 0.004933961 | 10.08362919 |
|                | BP | GO:1990542~mitochondrial transmembrane transport          | 4   | 0.004933961 | 10.08362919 |
|                | BP | GO:0009062~fatty acid catabolic process                   | 4   | 0.008212616 | 8.643110735 |
|                | BP | GO:1905515~non-motile cilium assembly                     | 6   | 0.010390025 | 4.321555368 |
|                | BP | GO:0015031~protein transport                              | 16  | 0.020154758 | 1.905567721 |
|                | BP | GO:0098789~pre-mRNA cleavage required for polyadenylation | 3   | 0.023895814 | 11.34408284 |
|                | BP | GO:0051290~protein heterotetramerization                  | 3   | 0.023895814 | 11.34408284 |
|                | BP | GO:0006432~phenylalanyl-tRNA aminoacylation               | 3   | 0.023895814 | 11.34408284 |
|                | BP | GO:0042760~very long-chain fatty acid catabolic process   | 3   | 0.023895814 | 11.34408284 |
|                | BP | GO:0007033~vacuole organization                           | 3   | 0.023895814 | 11.34408284 |
|                | BP | GO:0006914~autophagy                                      | 8   | 0.026912452 | 2.688967784 |
|                | BP | GO:0006298~mismatch repair                                | 5   | 0.027455209 | 4.201512163 |
|                | BP | GO:0006606~protein import into nucleus                    | 9   | 0.029716118 | 2.430874894 |
|                | BP | GO:0016192~vesicle-mediated transport                     | 14  | 0.033077095 | 1.890680473 |
|                | BP | GO:0009306~protein secretion                              | 6   | 0.034306184 | 3.241166526 |
|                | BP | GO:0031119~tRNA pseudouridine synthesis                   | 3   | 0.038096917 | 9.075266272 |
|                | BP | GO:0007127~meiosis I                                      | 3   | 0.038096917 | 9.075266272 |
|                | BP | GO:0006811~ion transport                                  | 7   | 0.041095587 | 2.714823244 |
|                | CC | GO:0005739~mitochondrion                                  | 102 | 7.46E-21    | 2.723202333 |
|                | CC | GO:0005743~mitochondrial inner membrane                   | 35  | 2.66E-11    | 3.744173052 |

|                          |    |                                                                                    |     |             |             |
|--------------------------|----|------------------------------------------------------------------------------------|-----|-------------|-------------|
|                          | CC | GO:0042645~mitochondrial nucleoid                                                  | 8   | 7.61E-05    | 6.894032922 |
|                          | CC | GO:0005777~peroxisome                                                              | 12  | 6.48E-04    | 3.384343434 |
|                          | CC | GO:0005741~mitochondrial outer membrane                                            | 13  | 7.98E-04    | 3.102314815 |
|                          | CC | GO:0005759~mitochondrial matrix                                                    | 16  | 0.001776339 | 2.481851852 |
|                          | CC | GO:0005730~nucleolus                                                               | 33  | 0.001876934 | 1.771217801 |
|                          | CC | GO:0005778~peroxisomal membrane                                                    | 7   | 0.0052985   | 4.17619302  |
|                          | CC | GO:0016592~mediator complex                                                        | 8   | 0.00842963  | 3.353853854 |
|                          | CC | GO:0070209~ASTRA complex                                                           | 3   | 0.011893753 | 15.51157407 |
|                          | CC | GO:0005829~cytosol                                                                 | 110 | 0.020687985 | 1.215294265 |
|                          | CC | GO:0005751~mitochondrial respiratory chain complex IV                              | 5   | 0.02070288  | 4.562227669 |
|                          | CC | GO:0000176~nuclear exosome (RNase complex)                                         | 4   | 0.022691616 | 6.20462963  |
|                          | CC | GO:1990130~Iml1 complex                                                            | 3   | 0.022774194 | 11.63368056 |
|                          | CC | GO:0045252~oxoglutarate dehydrogenase complex                                      | 3   | 0.022774194 | 11.63368056 |
|                          | CC | GO:0005789~endoplasmic reticulum membrane                                          | 32  | 0.024194885 | 1.490601713 |
|                          | CC | GO:0034098~VCP-NPL4-UFD1 AAA ATPase complex                                        | 3   | 0.036349164 | 9.306944444 |
|                          | CC | GO:0005847~mRNA cleavage and polyadenylation specific-<br>ity factor complex       | 4   | 0.037790808 | 5.170524691 |
|                          | MF | GO:0050660~flavin adenine dinucleotide binding                                     | 17  | 1.78E-08    | 5.598075333 |
|                          | MF | GO:0010181~FMN binding                                                             | 7   | 8.22E-05    | 8.333786355 |
|                          | MF | GO:0005524~ATP binding                                                             | 100 | 6.40E-04    | 1.385589239 |
|                          | MF | GO:0016887~ATPase activity                                                         | 33  | 0.001164913 | 1.824078748 |
|                          | MF | GO:0005515~protein binding                                                         | 160 | 0.003213177 | 1.227118478 |
|                          | MF | GO:0017056~structural constituent of nuclear pore                                  | 6   | 0.006013595 | 4.887483727 |
|                          | MF | GO:0008757~S-adenosylmethionine-dependent methyltrans-<br>ferase activity          | 9   | 0.007437892 | 3.09540636  |
|                          | MF | GO:0015075~ion transmembrane transporter activity                                  | 4   | 0.00770157  | 8.844018173 |
|                          | MF | GO:0000049~tRNA binding                                                            | 9   | 0.009688546 | 2.963686941 |
|                          | MF | GO:0070403~NAD+ binding                                                            | 5   | 0.010232558 | 5.527511358 |
|                          | MF | GO:0003988~acetyl-CoA C-acyltransferase activity                                   | 3   | 0.011945024 | 15.4770318  |
|                          | MF | GO:0003676~nucleic acid binding                                                    | 22  | 0.014509491 | 1.746126665 |
|                          | MF | GO:0016491~oxidoreductase activity                                                 | 14  | 0.015025996 | 2.103674226 |
|                          | MF | GO:0005324~long-chain fatty acid transporter activity                              | 4   | 0.016769288 | 6.878680801 |
|                          | MF | GO:0008137~NADH dehydrogenase (ubiquinone) activity                                | 5   | 0.020853744 | 4.552068177 |
|                          | MF | GO:0030170~pyridoxal phosphate binding                                             | 8   | 0.02150421  | 2.814005782 |
|                          | MF | GO:0004826~phenylalanine-tRNA ligase activity                                      | 3   | 0.022870168 | 11.60777385 |
|                          | MF | GO:0000175~3'-5'-exoribonuclease activity                                          | 5   | 0.030666017 | 4.072903106 |
|                          | MF | GO:0005506~iron ion binding                                                        | 13  | 0.037800842 | 1.916203937 |
|                          | MF | GO:0051539~4 iron, 4 sulfur cluster binding                                        | 6   | 0.046489371 | 2.995554542 |
| Under-<br>domi-<br>nance | BP | GO:0000122~negative regulation of transcription from RNA<br>polymerase II promoter | 29  | 5.66E-08    | 3.302966574 |
|                          | BP | GO:0008380~RNA splicing                                                            | 9   | 1.05E-04    | 6.003914609 |
|                          | BP | GO:0006397~mRNA processing                                                         | 10  | 1.47E-04    | 5.028919929 |

|    |                                                                                 |    |             |             |
|----|---------------------------------------------------------------------------------|----|-------------|-------------|
| BP | GO:0006412~translation                                                          | 13 | 1.84E-04    | 3.727576614 |
| BP | GO:0030168~platelet activation                                                  | 5  | 2.38E-04    | 14.85817252 |
| BP | GO:0045944~positive regulation of transcription from RNA polymerase II promoter | 25 | 2.86E-04    | 2.269998579 |
| BP | GO:0030433~ubiquitin-dependent ERAD pathway                                     | 8  | 6.63E-04    | 5.336812986 |
| BP | GO:0048536~spleen development                                                   | 5  | 6.70E-04    | 11.67427841 |
| BP | GO:0051258~protein polymerization                                               | 4  | 9.01E-04    | 18.67884545 |
| BP | GO:0006281~DNA repair                                                           | 10 | 0.00280323  | 3.369894798 |
| BP | GO:0071230~cellular response to amino acid stimulus                             | 5  | 0.002805927 | 8.171994885 |
| BP | GO:0006457~protein folding                                                      | 9  | 0.00322461  | 3.631997727 |
| BP | GO:0010718~positive regulation of epithelial to mesenchymal transition          | 5  | 0.004037439 | 7.429086259 |
| BP | GO:0006880~intracellular sequestering of iron ion                               | 3  | 0.005349713 | 24.51598465 |
| BP | GO:0006325~chromatin organization                                               | 8  | 0.008977821 | 3.396153718 |
| BP | GO:0006749~glutathione metabolic process                                        | 5  | 0.009788596 | 5.837139204 |
| BP | GO:0006364~rRNA processing                                                      | 6  | 0.011564626 | 4.358397272 |
| BP | GO:0048103~somatic stem cell division                                           | 3  | 0.012841689 | 16.34398977 |
| BP | GO:0001654~eye development                                                      | 4  | 0.013946253 | 7.691289303 |
| BP | GO:0045892~negative regulation of transcription, DNA-templated                  | 11 | 0.015297827 | 2.429511993 |
| BP | GO:0002181~cytoplasmic translation                                              | 5  | 0.015629892 | 5.107496803 |
| BP | GO:0007596~blood coagulation                                                    | 5  | 0.015629892 | 5.107496803 |
| BP | GO:0051897~positive regulation of protein kinase B signaling                    | 5  | 0.017368489 | 4.952724173 |
| BP | GO:0090314~positive regulation of protein targeting to membrane                 | 3  | 0.023021434 | 12.25799233 |
| BP | GO:0016573~histone acetylation                                                  | 4  | 0.024937585 | 6.226281817 |
| BP | GO:0043066~negative regulation of apoptotic process                             | 10 | 0.025511648 | 2.36869417  |
| BP | GO:0045893~positive regulation of transcription, DNA-templated                  | 12 | 0.026545759 | 2.120301376 |
| BP | GO:0030970~retrograde protein transport, ER to cytosol                          | 3  | 0.035540444 | 9.806393862 |
| BP | GO:0006826~iron ion transport                                                   | 3  | 0.035540444 | 9.806393862 |
| BP | GO:0001649~osteoblast differentiation                                           | 5  | 0.035585505 | 3.986338968 |
| BP | GO:0006334~nucleosome assembly                                                  | 5  | 0.035585505 | 3.986338968 |
| BP | GO:0006260~DNA replication                                                      | 6  | 0.035796337 | 3.268797954 |
| BP | GO:0000398~mRNA splicing, via spliceosome                                       | 8  | 0.038050212 | 2.538872197 |
| BP | GO:0060325~face morphogenesis                                                   | 3  | 0.042577088 | 8.914903511 |
| BP | GO:0006465~signal peptide processing                                            | 3  | 0.042577088 | 8.914903511 |
| BP | GO:0006338~chromatin remodeling                                                 | 6  | 0.042830655 | 3.113140909 |
| BP | GO:0009615~response to virus                                                    | 4  | 0.043617861 | 5.028919929 |
| BP | GO:0042127~regulation of cell proliferation                                     | 6  | 0.045347317 | 3.064498082 |
| BP | GO:0008285~negative regulation of cell proliferation                            | 8  | 0.047179639 | 2.421331818 |



|    |                                                                                                                            |     |             |             |
|----|----------------------------------------------------------------------------------------------------------------------------|-----|-------------|-------------|
| CC | GO:0005788~endoplasmic reticulum lumen                                                                                     | 10  | 5.27E-07    | 9.684925567 |
| CC | GO:0005634~nucleus                                                                                                         | 121 | 6.21E-05    | 1.385388866 |
| CC | GO:0005654~nucleoplasm                                                                                                     | 47  | 8.90E-05    | 1.820766007 |
| CC | GO:0005730~nucleolus                                                                                                       | 22  | 1.96E-04    | 2.506686617 |
| CC | GO:0005840~ribosome                                                                                                        | 12  | 5.38E-04    | 3.559864533 |
| CC | GO:0000792~heterochromatin                                                                                                 | 5   | 0.001130644 | 10.29023342 |
| CC | GO:0005615~extracellular space                                                                                             | 42  | 0.002054596 | 1.628983947 |
| CC | GO:0000785~chromatin                                                                                                       | 12  | 0.002376954 | 2.97101476  |
| CC | GO:0005577~fibrinogen complex                                                                                              | 3   | 0.002691395 | 32.92874693 |
| CC | GO:0005783~endoplasmic reticulum                                                                                           | 25  | 0.003485818 | 1.89245672  |
| CC | GO:0005787~signal peptidase complex                                                                                        | 3   | 0.008615635 | 19.75724816 |
| CC | GO:0071011~precatalytic spliceosome                                                                                        | 5   | 0.009552732 | -           |
| MF | GO:0003682~chromatin binding                                                                                               | 21  | 8.31E-07    | 3.743589744 |
| MF | GO:0003723~RNA binding                                                                                                     | 31  | 5.57E-05    | 2.24037224  |
| MF | GO:0042393~histone binding                                                                                                 | 11  | 2.27E-04    | 4.296415195 |
| MF | GO:0003677~DNA binding                                                                                                     | 32  | 3.73E-04    | 1.982853748 |
| MF | GO:0003735~structural constituent of ribosome                                                                              | 13  | 7.48E-04    | 3.204998311 |
| MF | GO:0031386~protein tag                                                                                                     | 4   | 0.002419471 | 13.9047619  |
| MF | GO:0001228~transcriptional activator activity, RNA polymerase II transcription regulatory region sequence-specific binding | 14  | 0.002898389 | 2.602495544 |
| MF | GO:0003755~peptidyl-prolyl cis-trans isomerase activity                                                                    | 6   | 0.003024942 | 5.959183673 |
| MF | GO:0004364~glutathione transferase activity                                                                                | 5   | 0.003237998 | 7.9004329   |
| MF | GO:0001221~transcription cofactor binding                                                                                  | 4   | 0.006739148 | 9.931972789 |
| MF | GO:0001046~core promoter sequence-specific DNA binding                                                                     | 4   | 0.011813583 | 8.179271709 |
| MF | GO:0051082~unfolded protein binding                                                                                        | 7   | 0.015032229 | 3.476190476 |
| MF | GO:0042826~histone deacetylase binding                                                                                     | 6   | 0.02504802  | 3.596059113 |
| MF | GO:0030544~Hsp70 protein binding                                                                                           | 4   | 0.030346487 | 5.793650794 |
| MF | GO:0031492~nucleosomal DNA binding                                                                                         | 4   | 0.033771034 | 5.561904762 |
| MF | GO:0002020~protease binding                                                                                                | 4   | 0.033771034 | 5.561904762 |
| MF | GO:0042802~identical protein binding                                                                                       | 17  | 0.036495408 | 1.738095238 |
| MF | GO:0008320~protein transmembrane transporter activity                                                                      | 3   | 0.038050963 | 9.480519481 |
| MF | GO:0003756~protein disulfide isomerase activity                                                                            | 3   | 0.038050963 | 9.480519481 |

‘ – ’ means no significantly enriched was observed in the present gene set.

Table S5. Significantly enriched pathways of different gene sets in the liver.

| Gene set                   | Pathway                                    | Gene count | p-value     | Fold enrichment |
|----------------------------|--------------------------------------------|------------|-------------|-----------------|
| Maternal line vs. F1 cross | gga03060:Protein export                    | 8          | 0.003323397 | 3.832624113     |
|                            | gga03010:Ribosome                          | 21         | 0.003824806 | 1.97914196      |
|                            | gga00982:Drug metabolism - cytochrome P450 | 9          | 0.006016501 | 3.135783366     |

|                                    |                                                       |     |             |             |
|------------------------------------|-------------------------------------------------------|-----|-------------|-------------|
| Paternal line vs.<br>F1 cross      | gga04350:TGF-beta signaling pathway                   | 17  | 0.018012258 | 1.861560284 |
|                                    | gga04141:Protein processing in endoplasmic reticulum  | 22  | 0.018522714 | 1.68635461  |
|                                    | gga04310:Wnt signaling pathway                        | 22  | 0.02422121  | 1.642553191 |
|                                    | gga00980:Metabolism of xenobiotics by cytochrome P450 | 8   | 0.024271945 | 2.705381727 |
|                                    | gga03320:PPAR signaling pathway                       | 11  | 0.043150788 | 2.007565012 |
|                                    | gga00620:Pyruvate metabolism                          | 12  | 9.47E-07    | 6.539733764 |
|                                    | gga00071:Fatty acid degradation                       | 10  | 2.08E-05    | 6.110357304 |
|                                    | gga01212:Fatty acid metabolism                        | 12  | 4.16E-05    | 4.565474514 |
|                                    | gga00640:Propanoate metabolism                        | 9   | 7.23E-05    | 6.049253731 |
|                                    | gga03320:PPAR signaling pathway                       | 12  | 2.16E-04    | 3.84079602  |
|                                    | gga00010:Glycolysis / Gluconeogenesis                 | 10  | 7.49E-04    | 3.953760609 |
|                                    | gga00650:Butanoate metabolism                         | 6   | 0.004579296 | 5.260220636 |
|                                    | gga00280:Valine, leucine and isoleucine degradation   | 8   | 0.005283762 | 3.666214383 |
|                                    | gga01100:Metabolic pathways                           | 87  | 0.005780398 | 1.281434319 |
|                                    | gga04910:Insulin signaling pathway                    | 14  | 0.005944967 | 2.352487562 |
|                                    | gga04540:Gap junction                                 | 11  | 0.007952329 | 2.640547264 |
|                                    | gga00061:Fatty acid biosynthesis                      | 5   | 0.008322471 | 5.930640913 |
|                                    | gga00380:Tryptophan metabolism                        | 7   | 0.008772056 | 3.814844695 |
|                                    | gga04145:Phagosome                                    | 15  | 0.009394343 | 2.145125437 |
| Paternal line vs.<br>Maternal line | gga04216:Ferroptosis                                  | 6   | 0.021614371 | 3.666214383 |
|                                    | gga00982:Drug metabolism - cytochrome P450            | 6   | 0.021614371 | 3.666214383 |
|                                    | gga00480:Glutathione metabolism                       | 7   | 0.032293216 | 2.880597015 |
| Enhancing domi-<br>nance           | gga00564:Glycerophospholipid metabolism               | 8   | 0.003701393 | 3.957162471 |
|                                    | gga04010:MAPK signaling pathway                       | 13  | 0.007777406 | 2.367778901 |
|                                    | gga04310:Wnt signaling pathway                        | 9   | 0.01556558  | 2.746245059 |
| Suppressing dom-<br>inance         | gga00970:Aminoacyl-tRNA biosynthesis                  | 7   | 0.004299584 | 4.443035001 |
|                                    | gga00640:Propanoate metabolism                        | 5   | 0.022345795 | 4.548821549 |
|                                    | gga00190:Oxidative phosphorylation                    | 9   | 0.031844352 | 2.408199643 |
| Over-dominance                     | gga03010:Ribosome                                     | 15  | 5.24E-06    | 4.429508197 |
|                                    | gga01100:Metabolic pathways                           | 168 | 8.85E-12    | 1.575212241 |
|                                    | gga04146:Peroxisome                                   | 22  | 3.32E-07    | 3.574611383 |
|                                    | gga00640:Propanoate metabolism                        | 12  | 7.73E-06    | 5.134441805 |
|                                    | gga01210:2-Oxocarboxylic acid metabolism              | 11  | 1.23E-05    | 5.430659602 |
|                                    | gga01200:Carbon metabolism                            | 22  | 1.41E-05    | 2.881574483 |
|                                    | gga00280:Valine, leucine and isoleucine degradation   | 14  | 1.75E-05    | 4.084215072 |
|                                    | gga01240:Biosynthesis of cofactors                    | 22  | 6.15E-04    | 2.241224598 |
|                                    | gga00071:Fatty acid degradation                       | 10  | 6.79E-04    | 3.88972864  |
|                                    | gga00785:Lipoic acid metabolism                       | 7   | 0.001255628 | 5.285454799 |

|                 |                                                       |    |             |             |
|-----------------|-------------------------------------------------------|----|-------------|-------------|
|                 | gga00190:Oxidative phosphorylation                    | 18 | 0.00199254  | 2.265194914 |
|                 | gga01212:Fatty acid metabolism                        | 12 | 0.002103333 | 2.906287814 |
|                 | gga00020:Citrate cycle (TCA cycle)                    | 8  | 0.003684507 | 3.803290226 |
|                 | gga00410:beta-Alanine metabolism                      | 8  | 0.003684507 | 3.803290226 |
|                 | gga00970:Aminoacyl-tRNA biosynthesis                  | 10 | 0.004952504 | 2.985140584 |
|                 | gga00260:Glycine, serine and threonine metabolism     | 9  | 0.006454666 | 3.122295692 |
|                 | gga00270:Cysteine and methionine metabolism           | 10 | 0.006777459 | 2.85246767  |
|                 | gga03018:RNA degradation                              | 12 | 0.01638394  | 2.232366002 |
|                 | gga00380:Tryptophan metabolism                        | 8  | 0.02180442  | 2.775373949 |
|                 | gga03320:PPAR signaling pathway                       | 11 | 0.022209763 | 2.241224598 |
|                 | gga00650:Butanoate metabolism                         | 6  | 0.02893685  | 3.348549003 |
| Under-dominance | gga04141:Protein processing in endoplasmic reticulum  | 25 | 2.80E-10    | 4.690972222 |
|                 | gga03010:Ribosome                                     | 14 | 3.32E-04    | 3.229849727 |
|                 | gga00982:Drug metabolism - cytochrome P450            | 7  | 8.99E-04    | 5.970328283 |
|                 | gga04350:TGF-beta signaling pathway                   | 11 | 0.00374327  | 2.948611111 |
|                 | gga00980:Metabolism of xenobiotics by cytochrome P450 | 6  | 0.006322693 | 4.966911765 |
|                 | gga03060:Protein export                               | 5  | 0.00922394  | 5.863715278 |
|                 | gga00480:Glutathione metabolism                       | 6  | 0.028347564 | 3.446428571 |
|                 | gga04310:Wnt signaling pathway                        | 11 | 0.045215664 | 2.010416667 |
|                 | gga03013:Nucleocytoplasmic transport                  | 8  | 0.045434631 | 2.421146953 |
|                 | gga00983:Drug metabolism - other enzymes              | 6  | 0.049766749 | 2.962719298 |
|                 | gga03040:Spliceosome                                  | 9  | 0.049870275 | 2.202717391 |

‘ – ’ means no significantly enriched pathway was detected in this gene set.

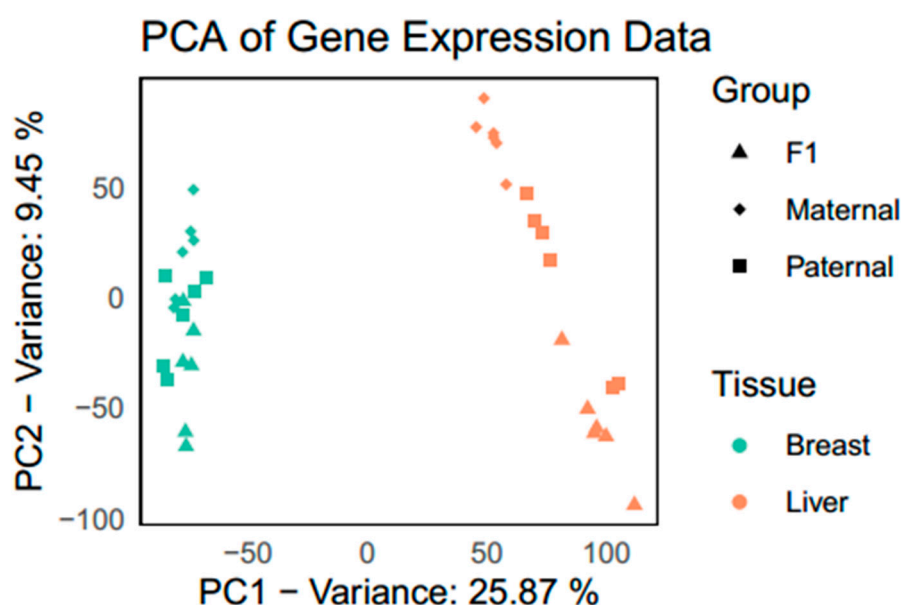

**Figure S1.** The principal component analysis (PCA) of sequencing data.
